# Supplementary material for: Knowledge, Attitudes and Practices toward Hepatitis B Virus Infection among Students of Medicine in Vietnam
Source: MDPI journal article supplement (doi:10.3390/ijerph18137081), 2021-07-02
Supplement: s1 [file s1]

## MEDICAL STUDENTS SURVEY

Student ID: \_\_\_\_\_

### **DEMOGRAPHICS**

1. Current age (years) : \_\_\_\_\_

2. Gender: ☐ Male

☐ Female

**3. Current University (please choose ONE):**

- ☐ Faculty of Medicine and Pharmacy- Tây Nguyên University
- ☐ Cần Thơ Medicine and Pharmacy University
- ☐ Hải Phòng Medicine and Pharmacy University
- ☐ Huế Medicine and Pharmacy University
- ☐ Thái Bình Medicine and Pharmacy University
- ☐ Thái Nguyên Medicine and Pharmacy University
- ☐ Hồ Chí Minh City Medicine and Pharmacy University
- ☐ Hà Nội Medicine University

### **DISEASE BURDEN, TRANSMISSION ROUTES AND PREVENTION MEASURES**

**4. In your opinion, approximately how many percent of Vietnam population has hepatitis B? (Please check ONE):**

- A. 1% (1 in 100 individuals)
- B. 5% (1 in 20 individuals)
- C. 10% (1 in 10 individuals)
- D. 25% (1 in 4 individuals)

**5. In your opinion, how did most people who have chronic hepatitis B in Vietnam got infected? (Please check ONE):**

- A. Infected mother to child at birth
- B. Unsafe injections
- C. Contaminated food or water
- D. Unprotected sex

**6. A person is most likely to develop chronic hepatitis B infection after the initial infection at? (Please check ONE):**

- A. Newborns
- B. Teenagers
- C. Middle-age and seniors
- D. Age is not a factor

**7. In your opinion, HBV can cause which of the followings? (Please check ONE):**

- A. Liver cirrhosis
- B. Liver failure
- C. Liver cancer
- D. Premature death

E. All of the above

**Question 8-13: How could HBV be transmitted?**

**8. Shaking hands with a person infected with HBV**

- A. True
- B. False
- C. Don't know

**9. Having unprotected sex with a person infected with HBV**

- A. True
- B. False
- C. Don't know

**10. Having blood transfusion**

- A. True
- B. False
- C. Don't know

**11. Sneezing or coughing**

- A. True
- B. False
- C. Don't know

**12. From mother to her child at birth**

- A. True
- B. False
- C. Don't know

**13. Eating with or sharing food and utensils with a person with HBV**

- A. True
- B. False
- C. Don't know

**Questions 14-19: What can prevent hepatitis B transmission?**

**14. Clean and cook food thoroughly**

- A. True
- B. False
- C. Don't know

**15. Provide hepatitis B vaccination to persons with no immunity**

- A. True
- B. False
- C. Don't know

**16. Do not reuse or share needles/syringes**

- A. True
- B. False
- C. Don't know

**17. Avoid sharing food and utensils or eating with a person with HBV**

- A. True
- B. False
- C. Don't know

**18. Use condom**

- A. True

- B. False
- C. Don't know

**19. What is the best HBV prevention for children whose mother is a hepatitis B carrier or has chronic hepatitis B?**

- A. Administer the hepatitis B Vaccine
- B. Administer HBIG shot
- C. Administer HBV Vaccine within first 24 hours of birth
- D. Administer the combination of HBIG shot and three doses of VGB Vaccine
- E. Don't know

**20. Are you confident in consulting patients about preventions for HBV?**

- A. Yes
- B. No
- C. Not sure / Don't know

**21. In your opinion, who needs to be vaccinated to prevent hepatitis B infection? (Please check ONE)**

- A. All healthy and stable newborns
- B. Family members of someone who has HBV
- C. Sex partner of persons with HBV
- D. Healthcare workers without immunity
- E. All of the above

**22. Do you think the hepatitis B vaccine is safe (Please check ONE):**

- A. Very safe
- B. Maybe safe
- C. Not very safe

**23. When would you give a healthy and stable baby the first dose of hepatitis B vaccine? (Please check ONE)**

- A. Within the first 24 hours of birth
- B. 1- 7 days old
- C. 1 month old

**24. What should a pregnant woman, who has hepatitis B, do to protect the newborn from becoming infected? (Please check ONE)**

- A. Administer hepatitis B vaccine to the pregnant woman
- B. Administer the first dose of hepatitis B vaccine and the HBIG shot within 12 hours of birth then complete the vaccine series
- C. Administer the first dose of hepatitis B vaccine and the HBIG shot after 48 hours of birth then complete the vaccine series

**25. Do you feel confident in ordering HBV Vaccination for newborns?**

- A. Yes
- B. No
- C. Not sure / Don't Know

**26. Have you been tested for HBV before?**

- A. Yes
- B. No -> Go to question 27

**26B. What was the result of the test?**

- A. Positive for immunity to hepatitis B
- B. Positive for chronic hepatitis B

- C. Negative for immunity and chronic hepatitis B
- D. Don't remember / Don't know

**27. Have you been vaccinated against HBV?**

- A. Yes
- B. No
- C. Don't remember / Don't Know

**28. Does the University of Medicine where you are studying require medical students to get vaccinated against HBV prior to to internship at hospital?**

- A. Yes
- B. No
- C. Not sure / Don't Know

**29. Does the University of Medicine where you are studying require medical students to get tested for HBV prior to to internship at hospital?**

- A. Yes
- B. No
- C. Not sure / Don't Know

**Question 30-34: As a medical student, which of the followings do you think can help healthcare workers to prevent infection from needlestick injury?**

**30. Wash hands with soap or disinfectant after each clinical procedure**

- A. True
- B. False
- C. Don't know

**31. Recap needle with two hands after use and discard immediately in a sharp-proof container**

- A. True
- B. False
- C. Don't know

**32. Do not recap needle and discard immediately in a sharp-proof container**

- A. True
- B. False
- C. Don't know

**33. Are there sharp-proof containers at your clinic for disposing needles and sharp objects? (Please check ONE):**

- A. Always
- B. At some places
- C. Not available

**34. Do you wear glove when administrating injection to patients? (Please check ONE):**

- A. Always
- B. Sometimes
- C. Never

#### **DIAGNOSIS AND MANAGEMENT FOR HBV PATIENTS**

**Question 35-38: In your opinion, which of the following patient groups would you order hepatitis B screening test even if they have normal level of AST / ALT in liver, or don't have hepatic symptoms?**

**35. Pregnant women**

- A. Yes
- B. No
- C. Don't know

**36. Persons infected with HIV**

- A. Yes
- B. No
- C. Don't know

**37. Men who have sex with men (MSM)**

- A. Yes
- B. No
- C. Don't know

**38. Family members of hepatitis B patients**

- A. Yes
- B. No
- C. Don't know

**39. Which single test would you order to confirm that a patient has chronic hepatitis B? (Please check ONE):**

- A. HBsAg
- B. Anti-HBs
- C. Anti-HBc
- D. HBeAg

**40. Which single test would you order to know if a patient has immunity to hepatitis B? (Please check ONE):**

- A. HBsAg
- B. Anti-HBs
- C. Anti-HBc
- D. Anti-HBe
- E. HBeAg

**41. Have you encountered any patient with chronic hepatitis B infection?**

- A. Yes
- B. No

**42. In your opinion, what is the symptom most patients with chronic hepatitis B present? (Please check ONE):**

- A. Headache and fatigue
- B. Nausea or vomiting
- C. Loss of appetite
- D. Jaundice
- E. All of the above
- F. None, there are usually no symptoms

**43. Which measurement in people with positive HBsAg show the need to order for treatment? (Please check all that apply):**

- A. ALT level
- B. HBV DNA
- C. Evaluation of liver cirrhosis
- D. The combination of the three above

**44. Which of following statements is true about HBV treatment? (Please check all that apply):**

- A. HBV is curable
- B. There is no cure, but there are medications effective to manage and control the disease
- C. There is no treatment available, but there are herbal medicine that can help to slower the disease progression.

**Question 45-48: What are goals of chronic HBV Treatment?**

**45. Sustain inhibition of HBV replication**

- A. True
- B. False
- C. Don't know

**46. Improve quality of life and prevent progression to liver cirrhosis and liver cancer:**

- A. True
- B. False
- C. Don't know

**47. Prevent spread of HBV infection in community, including infection from mother to child at birth:**

- A. True
- B. False
- C. Don't know

**48. Prevent outbreak of HBV:**

- A. True
- B. False
- C. Don't know

**Question 49-51: In your opinion, what are the rules in HBV treatment?**

**49. First line drugs are nucleot(s)ide analogues (NAs)**

- A. True
- B. False
- C. Don't know

**50. Treatment of chronic HBV with NAs is long term, or can be for a life time**

- A. True
- B. False
- C. Don't know

**51. Patients need to follow / obey the treatment process**

- A. True
- B. False
- C. Don't know

**52. Do you think that all patients with chronic HBV need to be treated? (Please check ONE):**

- A. Yes, all patients with chronic HBV should receive treatment as soon as possible
- B. Only patients with active liver damage or cirrhosis need to be treated
- C. There is no need to treat HBV because there is no cure yet

**53. Which of the followings is correct about monitoring HBV patients? (Please check ONE):**

- A. Only patients with symptoms need to be regularly monitored and screened
- B. Only patients who are on HBV treatment need to be regularly monitored and screened
- C. All patients with HBV need to be regularly monitored and screened, regardless of treatment indication

54. Without proper monitoring and treatment, what is the chance a patients would die of complications of chronic hepatitis B? *(Please check ONE):*
- A. Less than 5%
  - B. 5-10%
  - C. 15-25%
  - D. >30-40%%
  - E. Over 40%
55. Are you confident in ordering the tests to monitor patients with chronic HBV?
- A. Yes
  - B. No
  - C. Don't know / Not sure
56. Are you confident in giving prescription to patients with chronic HBV?
- A. Yes
  - B. No
  - C. Don't know / Not sure
57. In your opinion, when should newborns from mothers who have positive HBsAg be evaluated / screened for their possibility of having HBV infection?
- A. Right after birth
  - B. 6 months
  - C. 12 months
  - D. 24 months
  - E. Don't know
58. What test should be done to diagnose patients with chronic HBV infection? *(please check ONE)*
- A. HBsAg
  - B. Anti-HBs
  - C. Anti-HBc
  - D. HBeAg
59. What test can show that a patient has immunity against HBV? *(please check ONE)*
- A. HBsAg
  - B. Anti-HBs
  - C. Anti-HBc
  - D. Anti-HBe
  - E. HBeAg
60. Are you confident in ordering diagnosis test for patients with chronic HBV?
- A. Yes
  - B. No
  - C. Don't know / Note sure
61. Would you have any concern having casual contact or working together with a chronic HBV patients in the same office?
- A. Yes
  - B. No
  - C. Somewhat concern
62. Would you have any concern eating with (sharing food or utensils) with a chronic HBV patient?
- A. Yes

- B. No
- C. Somewhat concern



## MEDICAL STUDENT SURVEY

| Answer to the questionnaire |        |                 |        |
|-----------------------------|--------|-----------------|--------|
| Question Number             | Answer | Question Number | Answer |
| Q4                          | C      | Q33             | Always |
| Q5                          | A      | Q34             | Always |
| Q6                          | A      | Q35             | Yes    |
| Q7                          | E      | Q36             | Yes    |
| Q8                          | False  | Q37             | Yes    |
| Q9                          | True   | Q38             | Yes    |
| Q10                         | True   | Q39             | A      |
| Q11                         | False  | Q40             | B      |
| Q12                         | True   | Q41             | Yes    |
| Q13                         | False  | Q42             | F      |
| Q14                         | False  | Q43             | D      |
| Q15                         | True   | Q44             | B      |
| Q16                         | True   | Q45             | True   |
| Q17                         | False  | Q46             | True   |
| Q18                         | True   | Q47             | True   |
| Q19                         | D      | Q48             | True   |
| Q20                         | Yes    | Q49             | True   |
| Q21                         | E      | Q50             | True   |

|     |        |     |      |
|-----|--------|-----|------|
| Q22 | A      | Q51 | True |
| Q23 | A      | Q52 | B    |
| Q24 | C      | Q53 | C    |
| Q25 | Yes    | Q54 | C    |
| Q26 |        | Q55 | Yes  |
| Q27 |        | Q56 | Yes  |
| Q28 | Yes    | Q57 | C    |
| Q29 | Yes    | Q58 | A    |
| Q30 | False  | Q59 | B    |
| Q31 | False  | Q60 | Yes  |
| Q32 | True   | Q61 | No   |
| Q33 | Always | Q62 | No   |
